# Supplementary material for: Quaternized poly(2-(dimethylamino)ethyl methacrylate)-grafted agarose copolymers for multipurpose antibacterial applications
Source: Royal Society of Chemistry journal article supplement (doi:10.1039/c5ra11189g), 2015-01-01
Supplement: c5ra11189g1.pdf [file c5ra11189g1.pdf]

*Electronic Supplementary Information*

**Quaternized Poly(2-(dimethylamino)ethyl methacrylate)-Grafted Agarose Copolymers for Multipurpose Antibacterial Applications**

Li Qun Xu<sup>1,2\*</sup>, Ning Ning Li<sup>1,2</sup>, Jiu Cun Chen<sup>1,2</sup>, Guo Dong Fu<sup>3</sup>, En-Tang Kang<sup>4</sup>

<sup>1</sup> Institute for Clean Energy & Advanced Materials  
Faculty of Materials & Energy  
Southwest University  
Chongqing, P. R. China 400715

<sup>2</sup> Chongqing Key Laboratory for Advanced Materials and Technologies of Clean Energies  
Southwest University  
Chongqing, P.R. China 400715

<sup>3</sup> School of Chemistry and Chemical Engineering  
Southeast University  
Jiangning District, Nanjing, Jiangsu Province, P.R. China 211189

<sup>4</sup> Department of Chemical & Biomolecular Engineering  
National University of Singapore  
Kent Ridge, Singapore 117576

\* To whom correspondence should be addressed:  
E-mail: xulq@swu.edu.cn

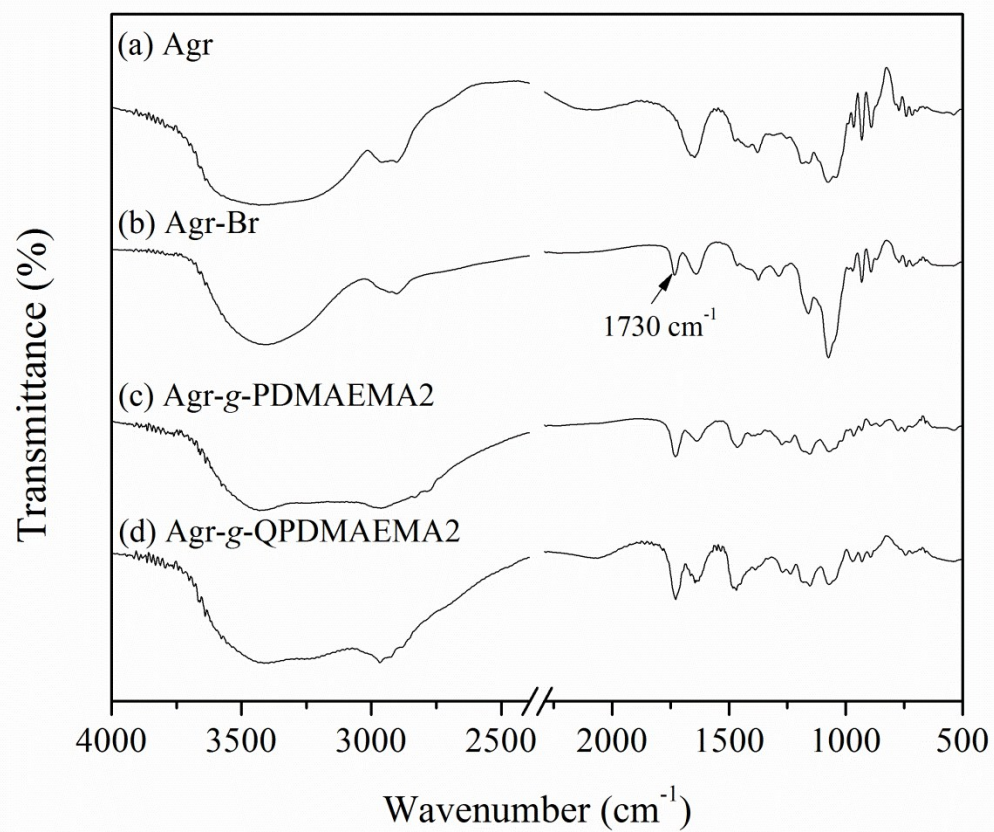

**Figure S1:** FT-IR spectra of the (a) Agr (b) Agr-Br (c) Agr-g-PDMAEMA2 and (d) Agr-g-QPDMAEMA2 copolymers.
